# Supplementary material for: The Clinical Impact of Different Coagulometers on Patient Outcomes
Source: Springer Nature journal article supplement (doi:10.1007/s12325-014-0124-x), 2014-06-01
Supplement: MOESM1 [file 9203306]

- Long term anticoagulation with vitamin K antagonists is used in millions of patients, and therapy control can be improved using a home-based coagulation monitor measuring international normalized ratio (INR).
- This retrospective analysis of data from over 4000 self-monitoring patients in the Netherlands seeks to determine whether the choice of INR monitor could have a clinical impact on patient outcomes.
- The patient populations using two different INR monitors, CoaguChek XS and INRatio2, were broadly similar, and the few differences observed were investigated using multivariate analysis.
- Coagulation control in these self-monitoring patients was good overall, with a low incidence of clinical events related to safety.
- The data suggest that the effect of the choice of coagulation monitor is clinically irrelevant.

This summary slide represents the opinions of the authors. Sponsorship for this study was funded by Alere International. Editorial assistance for this study was provided by Dr Toby Galbraith, IMC Healthcare Communication. For a full list of acknowledgments and conflicts of interest for all authors of this article, please see the full text online. Copyright © The Authors 2014. Creative Commons Attribution Noncommercial License (CC BY-NC).
